# Supplementary material
Source: PubMed Central journal article supplement (PMC3697099)
Supplement: NIHMS487460-supplement-SuppFigs.pdf [file NIHMS487460-supplement-SuppFigs.pdf]

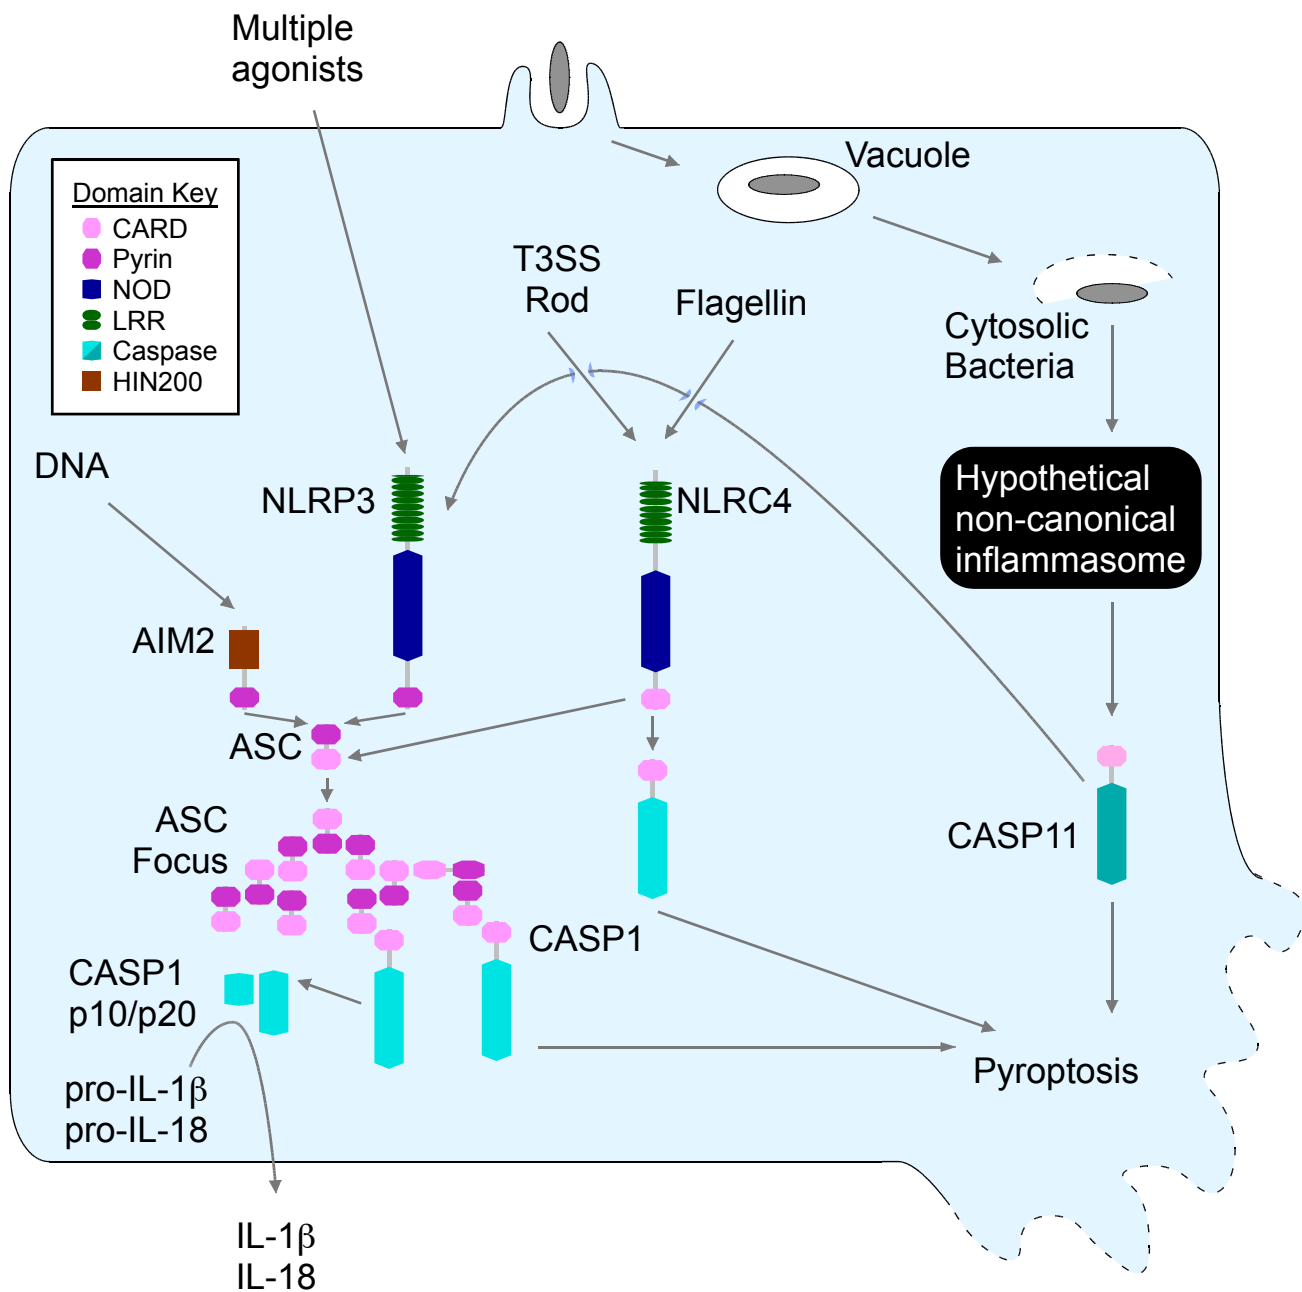

**Figure S1. Schematic of inflammasome detection pathways.** Canonical inflammasomes including NLRP3, AIM2, and NLRC4 activate caspase-1. NLRC4 contains a CARD domain that can bind to the CARD of caspase-1 directly through homotypic interaction, triggering pyroptosis. The NLRC4 also binds ASC through CARD homotypic interactions, resulting in recruitment of the entire complement of cellular ASC into a single ASC focus. The Pyrin domain of NLRP3 or AIM2 cannot bind directly to caspase-1, but triggers formation of the ASC focus via Pyrin-Pyrin homotypic interactions. The ASC focus recruits and activates caspase-1, resulting in its proteolytic maturation to the p10 and p20 fragments, and subsequent IL-1 and IL-18 cleavage and secretion. Therefore, cells that are deficient in *Nlrc4* and *Asc* cannot signal through any known canonical inflammasome. The activating platform for caspase-11 remains unknown; nevertheless, the hypothetical activator was named the non-canonical inflammasome. Our data indicate that cytosolic bacteria are detected through this hypothetical non-canonical inflammasome, resulting in caspase-11-dependent pyroptosis. Caspase-11 activation also triggers NLRP3 activation via an unknown mechanism (denoted by an arrow through tunnels).

Figure S2

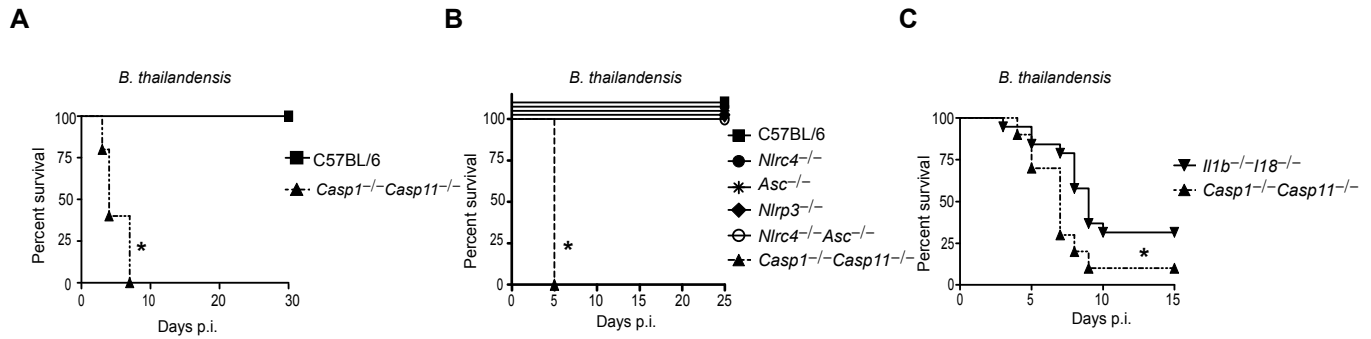

**Fig. S2. Burkholderia protection conferred by Casp1/11 is independent of all known canonical inflammasomes (A-C)** Wild type C57BL/6 or the indicated knockout mice were infected i.n. with *B. thailandensis* and survival was monitored. Data are representative of 4 (A), 1 (B) or pooled from 2 (C) experiments. For number of mice in each panel see Table S2. Statistically significant differences with respect to controls are indicated (log rank test for survival; \* =  $p \leq 0.05$ ).

**Figure S3**

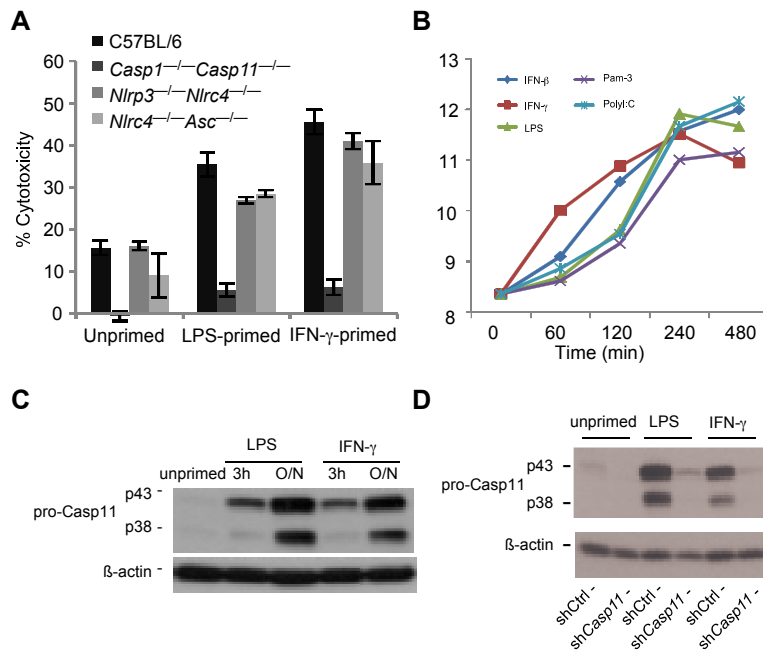

**Fig. S3. TLR ligands and IFN- $\gamma$  enhance *Casp11* expression and Caspase-11-dependent cell death.** (A) Untreated, LPS-primed, or IFN- $\gamma$ -primed BMMs were infected with *S. typhimurium*  $\Delta$ *sifA* and cytotoxicity was determined. (B) Transcriptional upregulation of *Casp11* in C57BL/6 BMMs after priming with the indicated molecules was determined using Affymetrix GeneChip technology. (C) Caspase-11 expression in untreated, LPS-primed, and IFN- $\gamma$ -primed C57BL/6 BMMs was determined by immunoblot. Blots were stripped and  $\beta$ -actin expression was determined as a loading control. (D) Caspase-11 expression in untreated, LPS-primed, and IFN- $\gamma$ -primed control or *Casp11* shRNA-expressing *Nlr4-Asc* iBMMs was determined by immunoblot. Loading controls were performed as in (C). Results are representative of more than 3 (A, B), 2 (C), or 1 (D) experiments. Statistically significant differences with respect to controls are indicated (Student's T-test; \* =  $p < 0.05$ ).

**Figure S4**

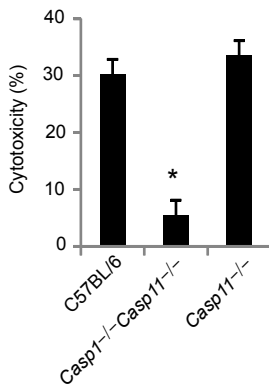

**Fig. S4. Caspase-11 is not required for pyroptosis induced by flagellin expressing wild type *L. pneumophila*.** Wild type *L. pneumophila* inadvertently translocate flagellin into the macrophage cytosol, resulting in detection through NLRC4, which activates Caspase-1. We investigated whether this response was altered in the absence of Caspase-11. C57BL/6, *Casp1*<sup>-/-</sup>*Casp11*<sup>-/-</sup>, and *Casp11*<sup>-/-</sup>-BMM infected with *L. pneumophila* at an MOI of 1 and cytotoxicity was determined 4 hours later; C57BL/6 and *Casp11*<sup>-/-</sup> BMMs showed similar cytotoxicity, indicating that Caspase-11 is not required for NLRC4-induced pyroptosis. Data are representative of at least 3 independent experiments. Statistically significant differences with respect to controls are indicated (Student's T-test; \* =  $p \leq 0.05$ ).

**Figure S5****A**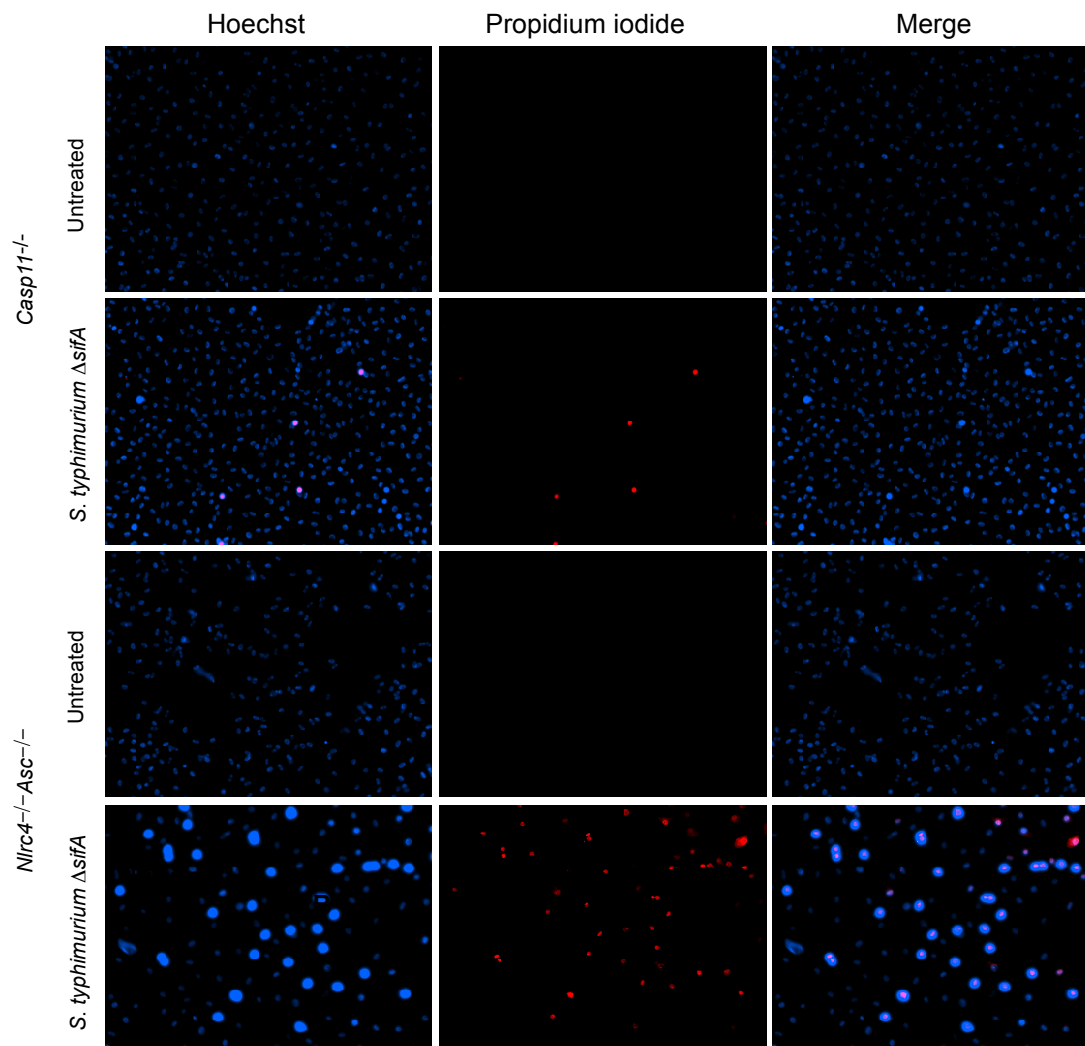**B**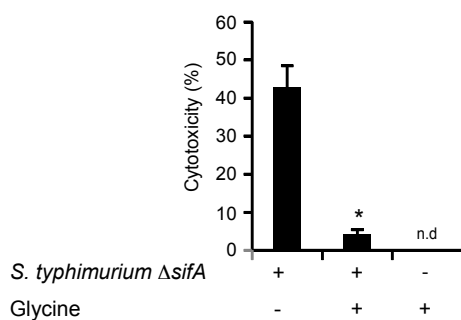

**Fig. 5S. Morphology of *S. typhimurium*  $\Delta$ *sifA*-induced pyroptosis.** IFN- $\gamma$ -primed *Nlrc4*<sup>-/-</sup> *Asc*<sup>-/-</sup> or *Casp11*<sup>-/-</sup> BMMs were infected for 8h with *S. typhimurium*  $\Delta$ *sifA* (MOI 50) (A) Representative fluorescence microscopy images of BMM stained with membrane permeant Hoechst and membrane impermeant propidium iodide (PI) 8 hours post infection as a measure of cell death in addition to LDH release. Although Hoechst is a membrane permeant dye, its staining intensity significantly increased in pyroptotic cell due after membrane rupture; in order to visualize both intact and pyroptotic cells the image is over-exposed for lysed cells, making their nucleus appear larger in the Hoechst channel. (B) Caspase-1-dependent pyroptotic cell death is known to be inhibited by addition of glycine to the media. In order to determine if Caspase-11-dependent cell death was occurring through a morphologically similar pathway, we added 20mM glycine at 4h post *S. typhimurium*  $\Delta$ *sifA* infection. LDH release was determined 4h later (total of 8h infection).
